# Supplementary material
Source: publisher figshare collection journal article supplement (https://future-science-group.figshare.com/ndownloader/files/30807535)

**Supplementary information for:**

**Transition metal-catalysed synthesis of new 3-substituted coumarin derivatives as antibacterial and cytostatic agents**

| **Contents:** |  |
| --- | --- |
| Table S1. | **S2–S3** |
| 1H NMR spectra of selected compounds | **S4S14** |

**Table S1**. Activity of coumarin derivatives (**1****5**, **10**, **11**, **16**, **17**, **21****23**, **25**, **26**, **28**, **29****38**) against Gram-positive (*Staphylococcus aureus,* MRSA (methicillin-resistant *Staphylococcus aureus*)*, Enterococcus faecalis* and VRE (vancomycin-resistant) *Enterococcus faecium*) and Gram-negative bacteria (*Escherichia coli, Klebsiella pneumoniae, Pseudomonas aeruginosa, Acinetobacter baumannii, Escherichia coli* ESBL (extended-spectrum ** -lactamases)*, Klebsiella pneumoniae* ESBLand *Acinetobacter baumanii*.

|  | | | | | | | | | | | | | | |
| --- | --- | --- | --- | --- | --- | --- | --- | --- | --- | --- | --- | --- | --- | --- |
| **Compd.** | **MIC (µg/mL)a** | | | | | | | | | | | | |  | |
| **Gram-positive bacteria** | | | | | | **Gram-negative bacteria** | | | | | | |  | |
| ***S.***  ***aureus*b** | | ***MRSA*c** | ***E.***  ***faecalis*d** | ***MRSA*e** | ***E.***  ***faecium* VREf** | ***E.***  ***coli*g** | ***K.***  ***pneumoniah*** | ***P.***  ***aeruginosa*i** | ***A.***  ***baumannii*j** | ***E.***  ***coli ESBL*k** | ***K.***  ***pneumoniae ESBL*l** | ***A.***  ***baumanii*m** | ***cLogP*n** | |
| **1** | >128 | | >128 | >128 | >128 | 128 | >128 | >128 | >128 | >128 | >128 | >128 | >128 | 1.46 | |
| **2** | >128 | | >128 | >128 | >128 | >128 | >128 | >128 | >128 | >128 | >128 | >128 | >128 | 5.03 | |
| **3** | >128 | | >128 | >128 | >128 | >128 | >128 | >128 | >128 | >128 | >128 | >128 | >128 | 5.57 | |
| **4** | >128 | | >128 | >128 | >128 | >128 | >128 | >128 | >128 | >128 | >128 | >128 | >128 | 6.10 | |
| **5** | >128 | | >128 | >128 | >128 | >128 | >128 | >128 | >128 | >128 | >128 | >128 | >128 | 6.80 | |
| **10** | 16 | | 16 | 32 | 16 | 32 | >128 | >128 | >128 | >128 | >128 | >128 | >128 | 3.92 | |
| **11** | >128 | | >128 | >128 | >128 | >128 | >128 | >128 | >128 | >128 | >128 | >128 | >128 | 3.27 | |
| **16** | >128 | | 128 | >128 | 128 | >128 | >128 | >128 | >128 | >128 | >128 | >128 | >128 | 3.13 | |
| **17** | >128 | | >128 | >128 | >128 | >128 | >128 | >128 | >128 | >128 | >128 | >128 | >128 | 3.65 | |
| **21** | >128 | | >128 | >128 | >128 | >128 | >128 | >128 | >128 | >128 | >128 | >128 | >128 | 0.23 | |
| **22** | >128 | | 128 | >128 | 128 | >128 | >128 | >128 | >128 | >128 | >128 | >128 | >128 | 0.61 | |
| **23** | >128 | | >128 | >128 | >128 | >128 | >128 | >128 | >128 | >128 | >128 | >128 | >128 | 0.54 | |
| **25** | >128 | | >128 | >128 | >128 | >128 | >128 | >128 | >128 | >128 | >128 | >128 | >128 | 3.37 | |
| **26** | >128 | | >128 | >128 | >128 | >128 | >128 | >128 | >128 | >128 | >128 | >128 | >128 | 3.87 | |
| **28** | >128 | | >128 | >128 | >128 | >128 | >128 | >128 | >128 | >128 | >128 | >128 | >128 | 3.30 | |
| **29** | >128 | | >128 | >128 | >128 | >128 | >128 | >128 | >128 | >128 | >128 | >128 | >128 | 2.74 | |
| **30** | >128 | | >128 | >128 | >128 | >128 | >128 | >128 | >128 | >128 | >128 | >128 | >128 | 3.30 | |
| **31** | >128 | | 128 | >128 | 128 | 128 | >128 | >128 | >128 | >128 | >128 | >128 | >128 | 2.73 | |
| **32** | >128 | | >128 | >128 | >128 | >128 | >128 | >128 | >128 | >128 | >128 | >128 | >128 | 3.51 | |
| **33** | >128 | | >128 | >128 | >128 | >128 | >128 | >128 | >128 | >128 | >128 | >128 | >128 | 5.14 | |
| **34** | >128 | | >128 | >128 | >128 | >128 | >128 | >128 | >128 | >128 | >128 | >128 | >128 | 3.66 | |
| **35** | >128 | | >128 | >128 | >128 | >128 | >128 | >128 | >128 | >128 | >128 | >128 | >128 | 3.49 | |
| **36** | >128 | | >128 | >128 | >128 | >128 | >128 | >128 | >128 | >128 | >128 | >128 | >128 | 2.09 | |
| **37** | >128 | | >128 | >128 | >128 | >128 | >128 | >128 | >128 | >128 | >128 | >128 | >128 | 4.23 | |
| **38** | >128 | | >128 | >128 | >128 | >128 | >128 | >128 | >128 | >128 | >128 | >128 | >128 | 3.01 | |
| **Ampicillin** | | 1 | 4 | 2 |  | 1 |  |  |  |  |  |  |  |  | |
| **Gentamicin** | | 0.125 | 0.25 | 8 |  | 0.25 |  |  |  |  |  |  |  |  | |
| **Amikacin** | |  |  |  |  |  |  |  | 2 |  |  |  |  |  | |
| **Ceftazidime** | |  |  |  |  |  | 0.5 |  | 4 |  | 8 | >128 |  |  | |
| **Ciprofloxacine** | | 0.25 |  | 0.5 |  | >128 | 0.004 | 0.06 | 0.5 |  | >128 | 1 | 0.06 |  | |
|  |  | |  |  |  |  |  |  |  |  |  |  |  |  | |

*a* MIC (minimum inhibitory concentration); b *Staphylococcus aureus* ATCC 25923; c MRSA (methicillin-resistant *Staphylococcus aureus*) 11710; d *Enterococcus faecalis* ATCC; e MRSA 13276; f VRE (vancomycin-resistant) *Enterococcus faecium* MKB 3019; g Escherichia coli ATCC 25922; h *Klebsiella pneumoniae* ATCC 700603; i *Pseudomonas aeruginosa* ATCC 27853; j *Acinetobacter. baumannii* ATCC 19606; k ESBL (extended-spectrum ** -lactamases (resistant to most **-lactam antibiotics)) *Escherichia coli* 26001; l ESBL *Klebsiella pneumoniae* 9350; m *Acinetobacter baumanii* 9768; n clogP (calculated logP values) were obtained by using ChemDraw Professional 15.

1H NMR spectrum of compound **16**

1H NMR spectrum of compound **17**

1H NMR spectrum of compound **18**

1H NMR spectrum of compound **19**

1H NMR spectrum of compound **19**

1H NMR spectrum of compound **21**

1H NMR spectrum of compound **22**

1H NMR spectrum of compound **23**

1H NMR spectrum of compound **24**

1H NMR spectrum of compound **25**

1H NMR spectrum of compound **26**

1H NMR spectrum of compound **27**

1H NMR spectrum of compound **28**

1H NMR spectrum of compound **29**

1H NMR spectrum of compound **30**

1H NMR spectrum of compound **31**

1H NMR spectrum of compound **32**

1H NMR spectrum of compound **33**

1H NMR spectrum of compound **35**


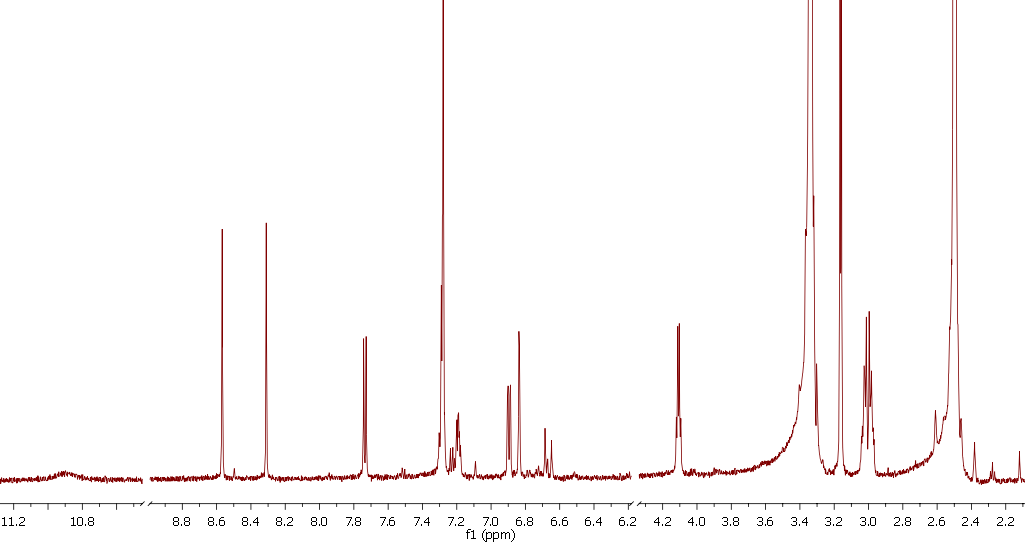


1H NMR spectrum of compound **37**


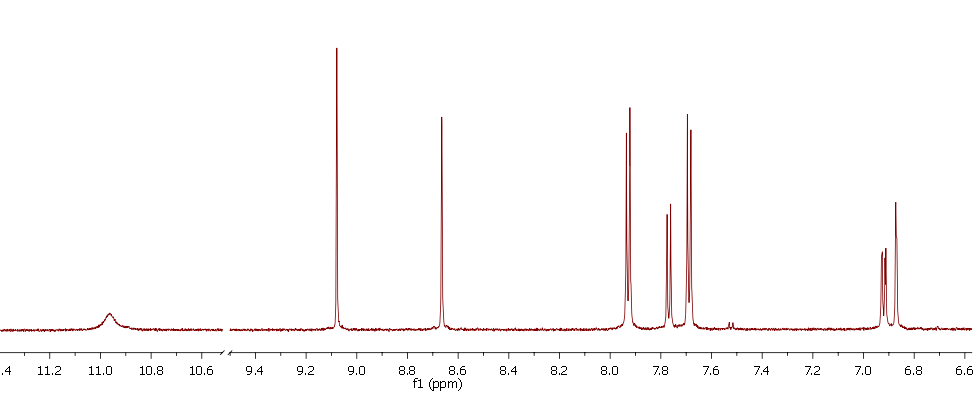


1H NMR spectrum of compound **38**


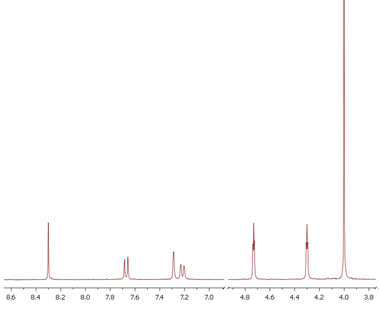

Supplement: Supplementary file 1 [file 30807535]
